# Supplementary material for: Targeted Induction of Lung Endothelial Cell Apoptosis Causes Emphysema-like Changes in the Mouse
Source: PubMed Central journal article supplement — J Biol Chem. 2008 Oct 24;283(43):29447–60. doi: 10.1074/jbc.M804595200 (PMC2570855; doi:10.1074/jbc.m804595200), 2008-10-24
Supplement: M804595200_1.pdf [file M804595200_1.pdf]

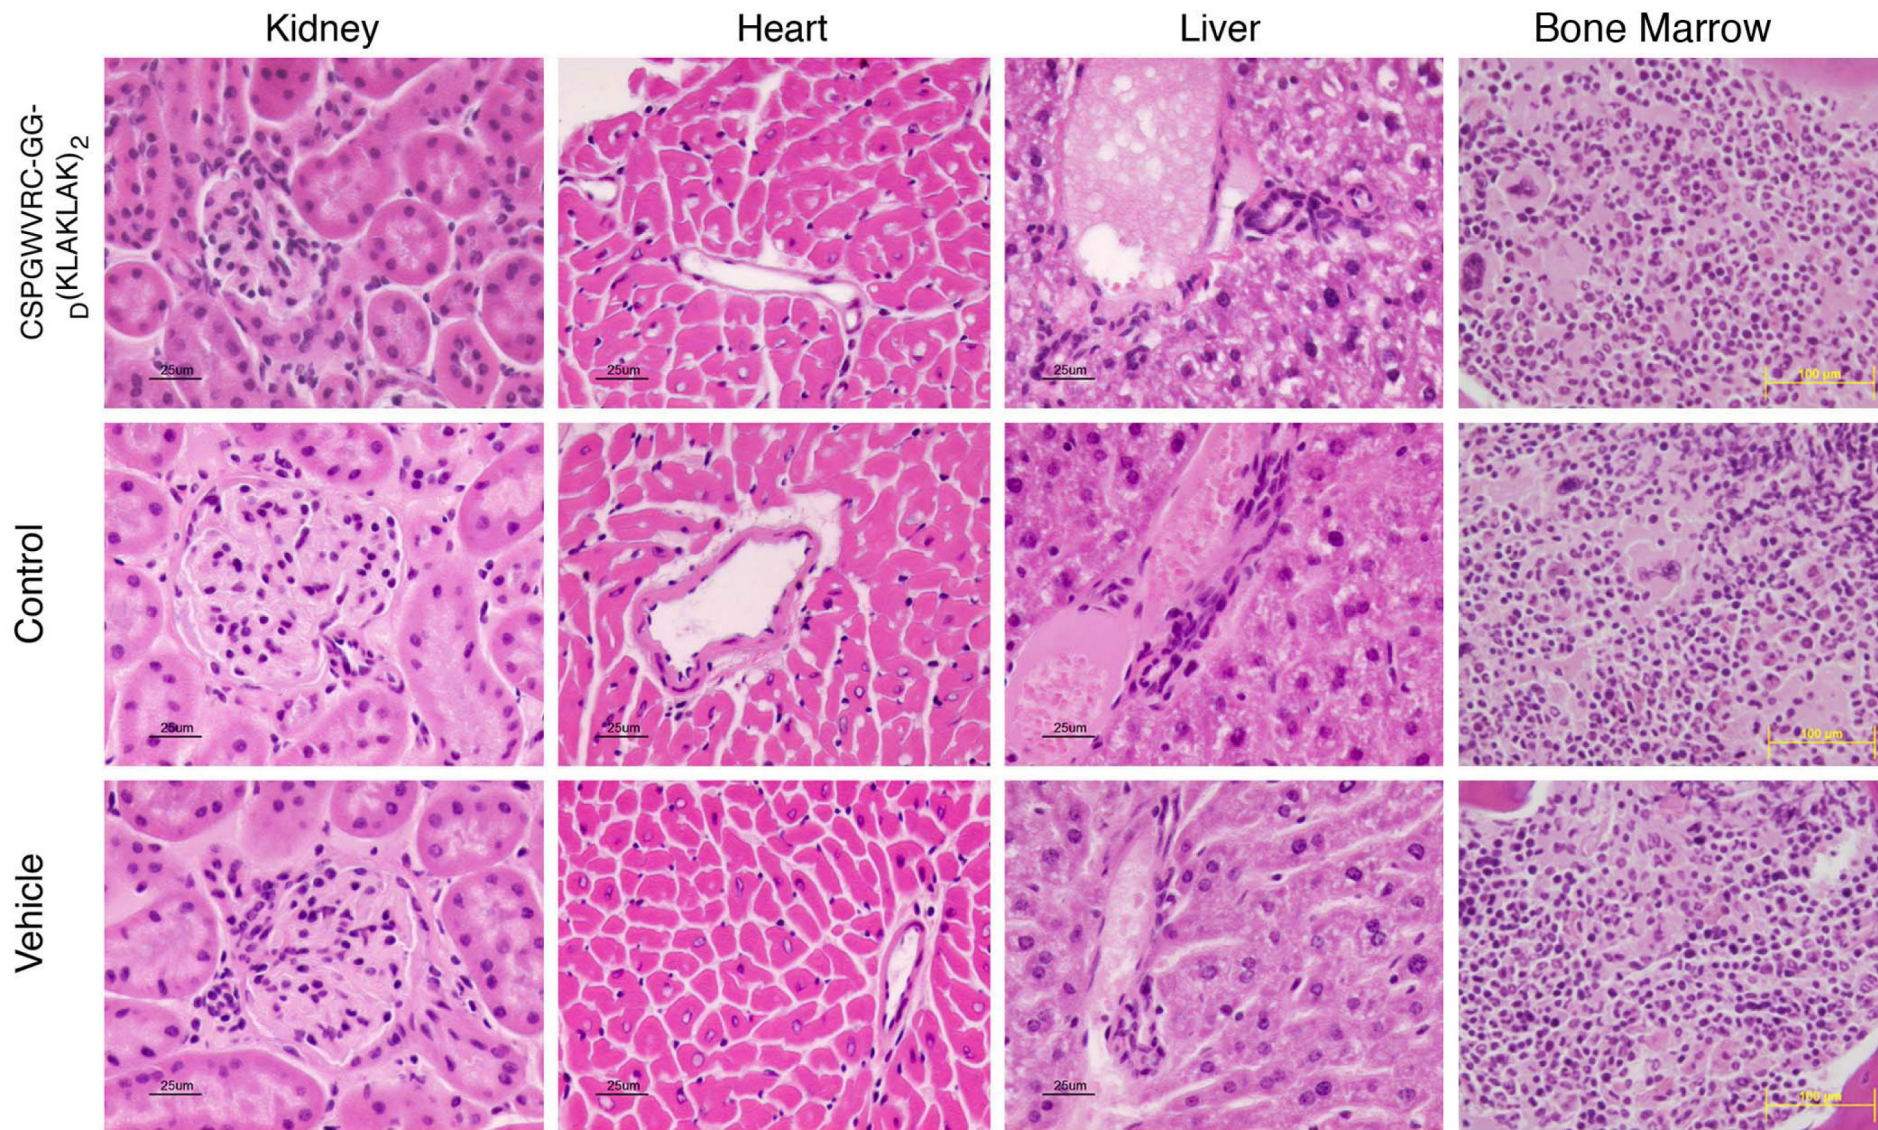

Giordano *et al.* - Fig.1S (Supplemental Data)

**a**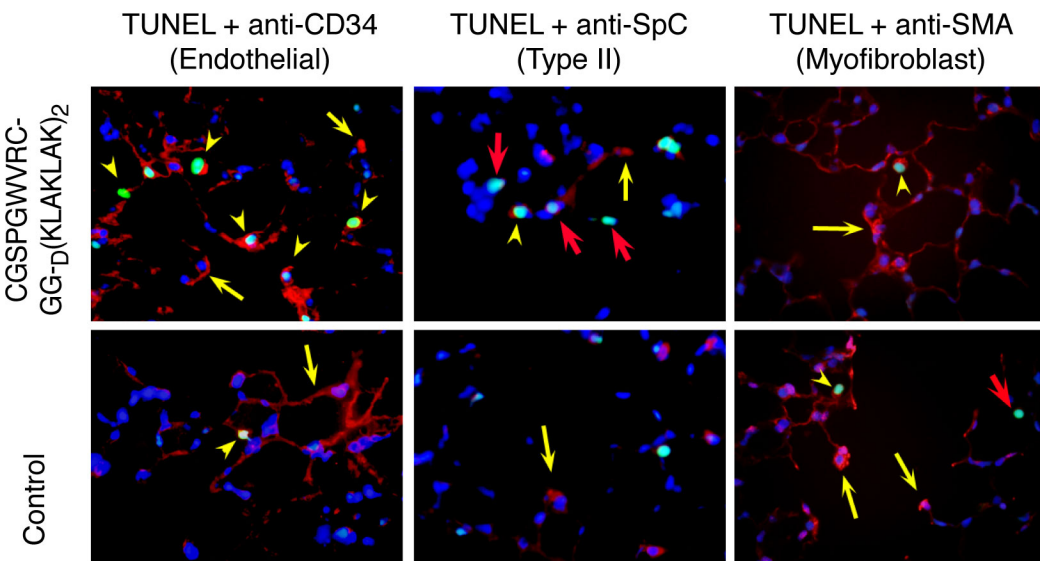**b**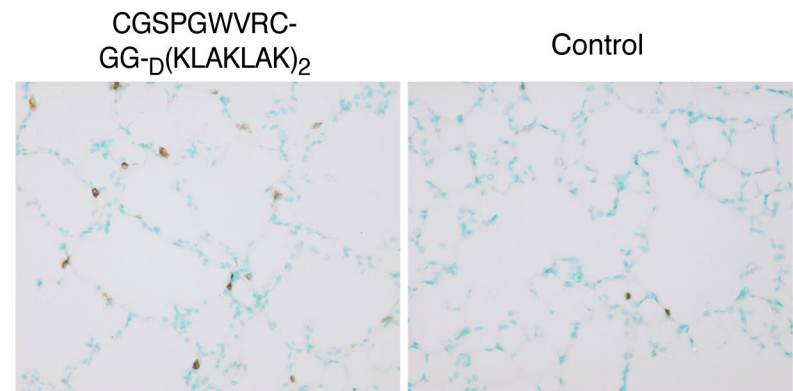**c**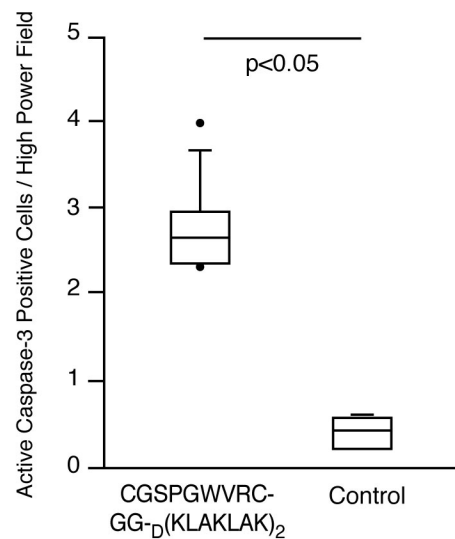

Giordano *et al.* - Fig.2S  
(Supplemental Data)

**d**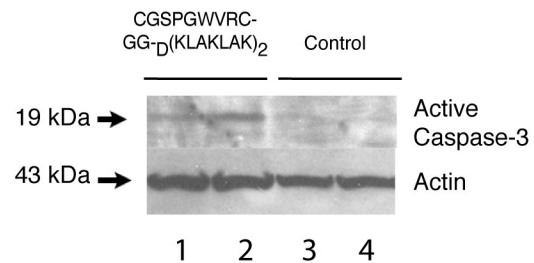



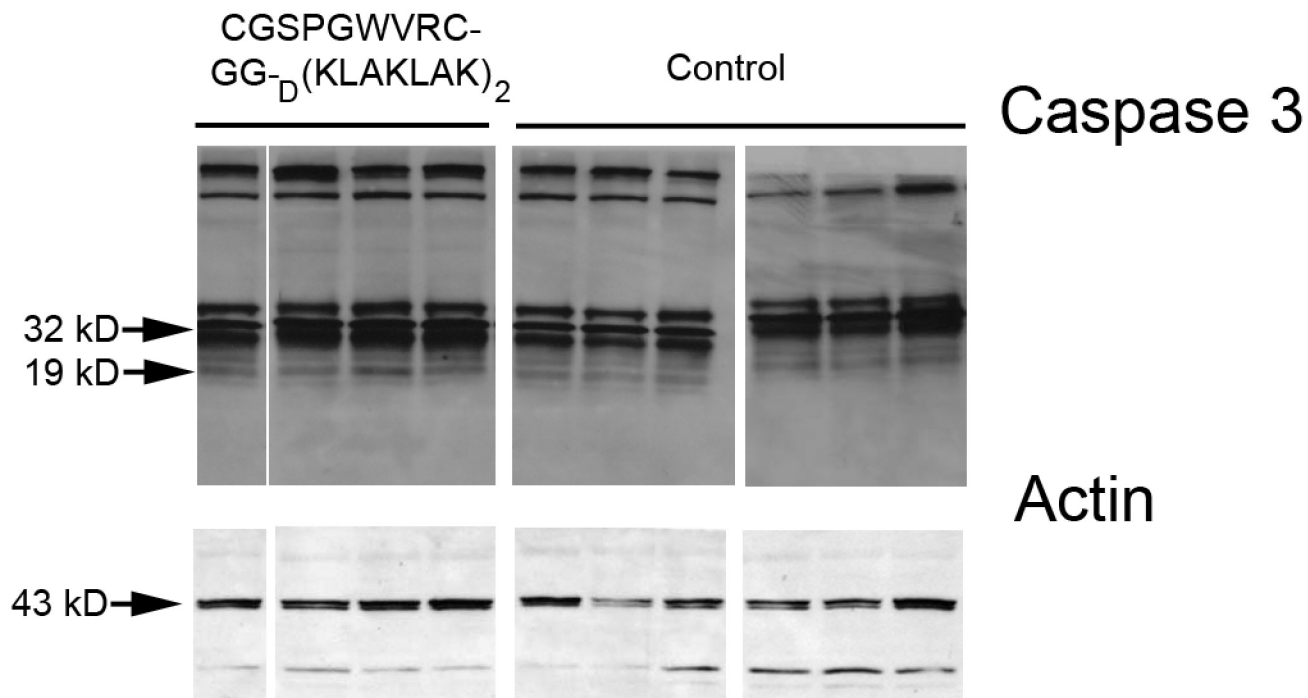

Giordano *et al.* - Fig.3S  
(Supplemental Data)

**a**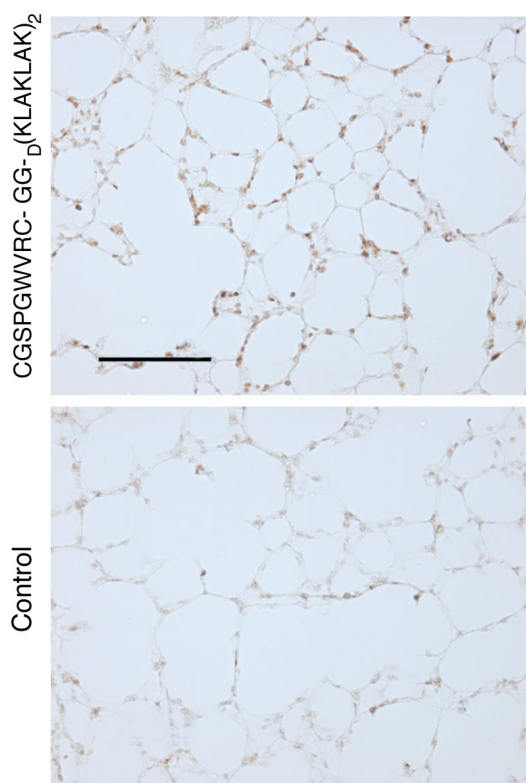**b**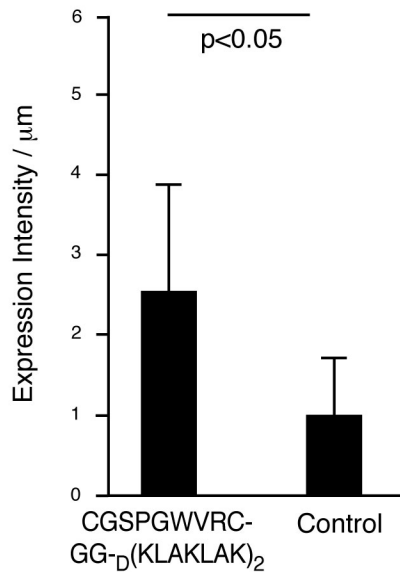

a

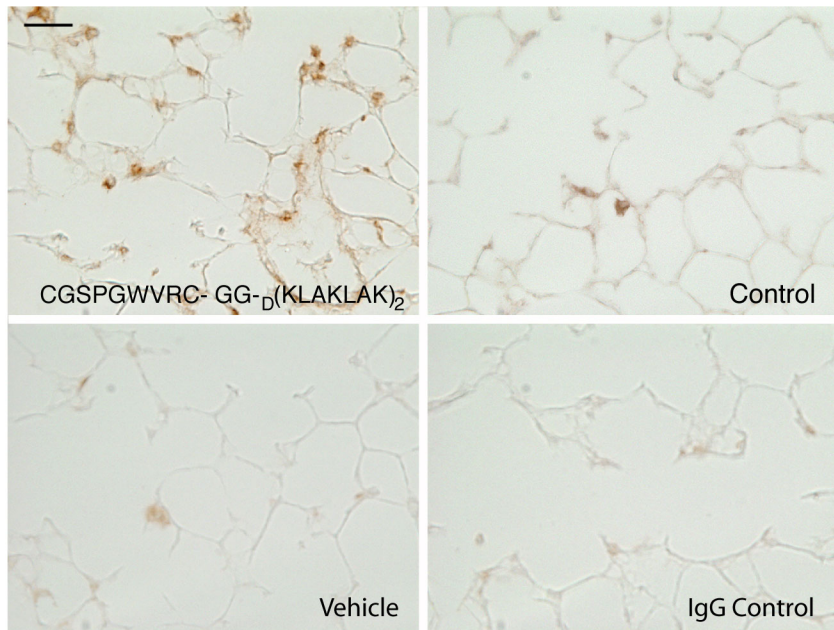

b

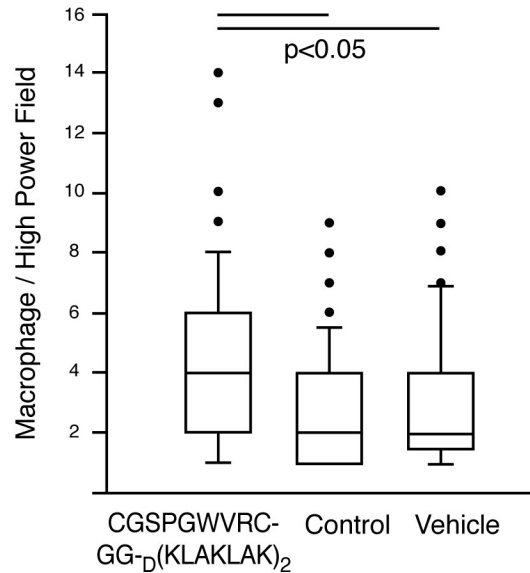

Giordano *et al.* - Fig.5S  
(Supplemental Data)

**Supplementary Fig. S1.** Control tissue sections from mice treated for 21 days with CGSPGWVRC-GG-<sub>D</sub>(KLAKLAK)<sub>2</sub> peptide, control peptides [CGSPGWVRC and <sub>D</sub>(KLAKLAK)<sub>2</sub>] and vehicle were stained with H&E. No apparent changes in the lung histology were detected in CGSPGWVRC-GG-<sub>D</sub>(KLAKLAK)<sub>2</sub>-treated animals. Scale bar, 25 μm (except in the rightmost column, 100 μm).

**Supplementary Fig. S2.** CGSPGWVRC-GG-<sub>D</sub>(KLAKLAK)<sub>2</sub> causes lung cell apoptosis after 4 days of treatment. **a**, Identification of apoptotic (TUNEL; green) endothelial cells (CD34-specific antibody; red), type II epithelial cells (SpC-specific antibody; red) and myofibroblast cells (SMA-specific antibody) in the lungs of CGSPGWVRC-GG-<sub>D</sub>(KLAKLAK)<sub>2</sub> or control peptide [CGSPGWVRC or (KLAKLAK)<sub>2</sub>]-treated mice after 4 days of treatment. Cell nuclei were stained with DAPI (blue). Shown are merged images, with co-localization of cell-specific markers and apoptosis (yellow arrowheads); examples of non-apoptotic cells with positive cell specific marker are indicated by yellow arrows while red arrows point to apoptotic cells lacking staining for a cell-specific marker. **b**, Active caspase-3 expression in lung sections of mice 4 days after treatment with CGSPGWVRC-GG-<sub>D</sub>(KLAKLAK)<sub>2</sub> or control peptides [CGSPGWVRC or <sub>D</sub>(KLAKLAK)<sub>2</sub>]. CGSPGWVRC-GG-<sub>D</sub>(KLAKLAK)<sub>2</sub> peptide-treated lungs show abundant active caspase-3-positive cells in the alveolar septa in contrast to control-treated lungs. **c**, Quantification of number of alveolar septal cells positive for active caspase-3. **d**, Increased expression of active caspase-3 was detected in CGSPGWVRC-GG-<sub>D</sub>(KLAKLAK)<sub>2</sub>-treated mice lungs in comparison with the control treated mice lungs as detected by Western blot analysis of lung tissue lysates with anti-active caspase-3 antibody. Densitometric quantification of active caspase-3 expression levels obtained in Western blot analysis normalized to actin were: lane-1, 0.58; lane-2, 0.42; lane-3, 0.18; lane-4, 0.15 densitometric units.

**Supplementary Fig. S3.** Western blot analysis of lung tissue lysates with anti-active caspase-3 and anti-actin antibodies after 21 days of treatment (image shows the whole gel scan of region highlighted in Fig. 5c). Arrows indicate actin (43 kDa), full length procaspase-3 (32 kDa) and active caspase-3 (19 kDa) bands.

**Supplementary Fig. S4.** CGSPGWVRC-GG-<sub>D</sub>(KLAKLAK)<sub>2</sub> peptide induces oxidative damage to mouse lungs as indicated by increasing 8-oxo-HG-dG levels. **a**, Immunohistochemical staining of 8-oxo-dG in lung sections from mice treated for 4 days with CGSPGWVRC-GG-<sub>D</sub>(KLAKLAK)<sub>2</sub> peptide or control peptides [CGSPGWVRC or <sub>D</sub>(KLAKLAK)<sub>2</sub>]. Lung sections from the CGSPGWVRC-GG-<sub>D</sub>(KLAKLAK)<sub>2</sub> peptide-treated mice show increased 8-oxo-HG-dG expression when compared to the lung sections from the control treated mice. Scale bar, 100 μm. **b**, Quantification of the 8-oxo-dG intensity in the lung tissues from CGSPGWVRC-GG-<sub>D</sub>(KLAKLAK)<sub>2</sub> peptide-treated mice show increased 8-oxo-dG expression when compared to the lung tissues of the control peptide-treated mice.

**Supplementary Fig. S5.** CGSPGWVRC-GG-<sub>D</sub>(KLAKLAK)<sub>2</sub> peptide treatment induces an influx of macrophages into mouse lungs **a**, Lung sections from mice treated for 21 days with vehicle, CGSPGWVRC-GG-<sub>D</sub>(KLAKLAK)<sub>2</sub> peptide or with control peptides [CGSPGWVRC and <sub>D</sub>(KLAKLAK)<sub>2</sub> peptides] were stained with the Mac-3 antibody to identify macrophages. Scale bar, 50 μm. **b**, An increased number of macrophages is seen in CGSPGWVRC-GG-<sub>D</sub>(KLAKLAK)<sub>2</sub>-treated animals in comparison to control animals.
